# Supplementary material for: The World Trade Center exposome and health effects in 9/11 rescue and recovery workers
Source: PubMed Central journal article supplement — Commun Med (Lond). 2024 Dec 9;4:257. doi: 10.1038/s43856-024-00683-9 (PMC11628551; doi:10.1038/s43856-024-00683-9), 2024-12-09
Supplement: 43856_2024_683_MOESM2_ESM.pdf [file 43856_2024_683_MOESM2_ESM.pdf]

- 1 Supplementary Data 1: The numerical data (source data) plotted in Figure 1
- 2 Supplementary Data 2 and 3: The numerical data (source data) plotted in Figure 2
